# Supplementary material
Source: MDPI journal article supplement (https://www.mdpi.com/2071-1050/13/12/6526)
Supplement: s1 [file s1]

Supplementary Materials:

# Identifying the Source of Heavy Metal Pollution and Apportionment in Agricultural Soils Impacted by Different Smelters in China by the Positive Matrix Factorization Model and the Pb Isotope Ratio Method

Danyang Yu <sup>1,2</sup>, Jingran Wang <sup>1</sup>, Yanhong Wang <sup>1,3,\*</sup>, Xueli Du <sup>1</sup>, Guochen Li <sup>1,3</sup> and Bo Li <sup>1,3</sup>

<sup>1</sup> Key Laboratory of Pollution Ecology and Environmental Engineering, Institute of Applied Ecology, Chinese Academy of Sciences, Shenyang 110016, China; yudy1996@163.com (D.Y.); Wangjr0409@hotmail.com (J.W.); duxl0306@163.com (X.D.); ligc@iae.ac.cn (G.L.); lib@iae.ac.cn (B.L.)

<sup>2</sup> School of Chemical Engineering, Shenyang University of Chemical Technology, Shenyang 110142, China

<sup>3</sup> Liaoning Engineering Technology Research Center of Agricultural Products Quality and Environment Safety Control, Shenyang 110016, China

\* Correspondence: wangyh@iae.ac.cn.; Tel.: +86-136-0407-5293

**Table S1.**

Regression relationship between heavy metal content (X) and distance (Y) from sample site to smelter (n = 50).

|         | Element | Equation                          | R <sup>2</sup> |
|---------|---------|-----------------------------------|----------------|
| Zhuzhou | Cd      | $Y = 42.844 - 3.402 x$            | 0.903          |
|         | Pb      | $Y = 49.705 - 0.157 x$            | 0.927          |
|         | As      | $Y = 205.665 - 143.887 \ln(x)$    | 0.901          |
|         | Hg      | $Y = 52.514 - 38.815 x$           | 0.915          |
|         | Cr      | $Y = -171.975 + 92.502 \ln(x)$    | 0.882          |
|         | Ni      | $Y = -270.111 + 188.009 \ln(x)$   | 0.765          |
|         | Cu      | $Y = 66.052 - 0.726 x$            | 0.885          |
|         | Zn      | $Y = 45.640 - 0.042 x$            | 0.920          |
| Huludao | Cd      | $Y = 1.055 - 8.512e^{-10} \ln(x)$ | 0.780          |
|         | Pb      | $Y = 149.372 - 0.150 x$           | 0.928          |
|         | As      | $Y = 1.345 - 7.256e^{-5} \ln(x)$  | 0.881          |
|         | Hg      | $Y = 2.177 - 0.001 \ln(x)$        | 0.908          |
|         | Cr      | $Y = 1.857 - 2.433e^{-5} \ln(x)$  | 0.589          |
|         | Ni      | $Y = 1.459 - 1.570e^{-5} \ln(x)$  | 0.787          |
|         | Cu      | $Y = 121.866 - 0.016 x$           | 0.714          |
|         | Zn      | $Y = 983.052 - 0.127 x$           | 0.704          |
